# Supplementary material for: Metagenome Analysis of Intestinal Bacteria in Healthy People, Patients With Inflammatory Bowel Disease and Colorectal Cancer
Source: Front Cell Infect Microbiol. 2021 Feb 26;11:599734. doi: 10.3389/fcimb.2021.599734 (PMC7962608; doi:10.3389/fcimb.2021.599734)
Supplement: Supplementary Table 6 — The differential pathways of healthy people, IBD, and CRC. [file Table_6.xlsx]

## Sheet: Sheet1
# Pathway	p-values	p-values (corrected)	Effect size
METSYN-PWY: L-homoserine and L-methionine biosynthesis	7.01e-91	1.47e-89	0.357338
PWY-5347: superpathway of L-methionine biosynthesis (transsulfuration)	4.9e-87	5.15e-86	0.348337
MET-SAM-PWY: superpathway of S-adenosyl-L-methionine biosynthesis	1.1e-87	1.54e-86	0.341941
PWY-6122: 5-aminoimidazole ribonucleotide biosynthesis II	6.02e-85	3.61e-84	0.319359
PWY-6277: superpathway of 5-aminoimidazole ribonucleotide biosynthesis	6.02e-85	3.61e-84	0.319359
HOMOSER-METSYN-PWY: L-methionine biosynthesis I	2.25e-86	1.89e-85	0.309747
PWY-6168: flavin biosynthesis III (fungi)	3.78e-69	1.44e-68	0.279321
P4-PWY: superpathway of L-lysine, L-threonine and L-methionine biosynthesis I	2.66e-70	1.12e-69	0.275552
PWY0-781: aspartate superpathway	1.24e-68	4.34e-68	0.270756
PWY-6703: preQ0 biosynthesis	2.07e-59	5.11e-59	0.265891
PWY-5695: urate biosynthesis/inosine 5'-phosphate degradation	7.43e-65	2.23e-64	0.261053
PWY-5304: superpathway of sulfur oxidation (Acidianus ambivalens)	5.53e-167	2.32e-165	0.248447
ARGININE-SYN4-PWY: L-ornithine de novo biosynthesis	1.24e-51	1.93e-51	0.241576
PWY-6121: 5-aminoimidazole ribonucleotide biosynthesis I	3.24e-67	1.05e-66	0.241496
1CMET2-PWY: N10-formyl-tetrahydrofolate biosynthesis	2.86e-52	4.62e-52	0.236578
DAPLYSINESYN-PWY: L-lysine biosynthesis I	1.46e-60	3.82e-60	0.232129
PWY-7663: gondoate biosynthesis (anaerobic)	9.48e-59	2.1e-58	0.229083
HISTSYN-PWY: L-histidine biosynthesis	1.04e-64	2.91e-64	0.226788
PWY-3841: folate transformations II	1e-53	1.75e-53	0.221921
RHAMCAT-PWY: L-rhamnose degradation I	1.65e-53	2.77e-53	0.221422
PYRIDNUCSYN-PWY: NAD biosynthesis I (from aspartate)	4.53e-59	1.06e-58	0.220076
PWY-6700: queuosine biosynthesis	9.14e-51	1.32e-50	0.21676
PYRIDOXSYN-PWY: pyridoxal 5'-phosphate biosynthesis I	4.5e-46	5.11e-46	0.205916
ARO-PWY: chorismate biosynthesis I	6.85e-54	1.25e-53	0.201592
PWY-5973: cis-vaccenate biosynthesis	6.64e-55	1.39e-54	0.200982
PWY-6125: superpathway of guanosine nucleotides de novo biosynthesis II	6.61e-48	8.42e-48	0.200022
PANTO-PWY: phosphopantothenate biosynthesis I	5.18e-50	7.26e-50	0.199054
PWY-4981: L-proline biosynthesis II (from arginine)	2.61e-71	1.22e-70	0.197581
PWY-7228: superpathway of guanosine nucleotides de novo biosynthesis I	4.77e-47	5.89e-47	0.191311
PRPP-PWY: superpathway of histidine, purine, and pyrimidine biosynthesis	4.41e-49	5.79e-49	0.191286
PWY-7229: superpathway of adenosine nucleotides de novo biosynthesis I	4.32e-44	4.42e-44	0.185533
PWY-6126: superpathway of adenosine nucleotides de novo biosynthesis II	1.16e-42	1.13e-42	0.184223
LACTOSECAT-PWY: lactose and galactose degradation I	1.26e-71	6.59e-71	0.176215
PWY-2942: L-lysine biosynthesis III	2.27e-43	2.27e-43	0.174116
PWY0-845: superpathway of pyridoxal 5'-phosphate biosynthesis and salvage	5.56e-40	4.76e-40	0.17223
COMPLETE-ARO-PWY: superpathway of aromatic amino acid biosynthesis	6.74e-47	7.86e-47	0.171264
PWY-7220: adenosine deoxyribonucleotides de novo biosynthesis II	6.58e-42	6.01e-42	0.170459
PWY-7222: guanosine deoxyribonucleotides de novo biosynthesis II	6.58e-42	6.01e-42	0.170459
PWY-5188: tetrapyrrole biosynthesis I (from glutamate)	3.92e-54	7.84e-54	0.168851
TRNA-CHARGING-PWY: tRNA charging	1.25e-44	1.31e-44	0.167365
HSERMETANA-PWY: L-methionine biosynthesis III	3.86e-45	4.16e-45	0.16657
PWY-2941: L-lysine biosynthesis II	4.01e-49	5.44e-49	0.164716
PWY-6936: seleno-amino acid biosynthesis	1.56e-45	1.73e-45	0.162702
PWY-6385: peptidoglycan biosynthesis III (mycobacteria)	9.73e-38	7.86e-38	0.152902
TCA: TCA cycle I (prokaryotic)	5.64e-51	8.46e-51	0.150271
PWY-5690: TCA cycle II (plants and fungi)	6.25e-54	1.19e-53	0.149942
PWY-6305: putrescine biosynthesis IV	5.21e-39	4.29e-39	0.149901
PWY-5484: glycolysis II (from fructose 6-phosphate)	1.95e-35	1.52e-35	0.144268
PWY-7234: inosine-5'-phosphate biosynthesis III	1.78e-41	1.59e-41	0.143149
PWY-6163: chorismate biosynthesis from 3-dehydroquinate	3.06e-37	2.43e-37	0.14043
PWY-6969: TCA cycle V (2-oxoglutarate:ferredoxin oxidoreductase)	4.94e-47	5.93e-47	0.138505
GLYCOLYSIS: glycolysis I (from glucose 6-phosphate)	6.27e-34	4.54e-34	0.135321
OANTIGEN-PWY: O-antigen building blocks biosynthesis (E. coli)	9.12e-40	7.66e-40	0.134641
ASPASN-PWY: superpathway of L-aspartate and L-asparagine biosynthesis	2.83e-34	2.12e-34	0.13212
PWY-3001: superpathway of L-isoleucine biosynthesis I	1.53e-32	1.07e-32	0.126552
PWY-6317: galactose degradation I (Leloir pathway)	2.7e-34	2.06e-34	0.123537
PWY-7383: anaerobic energy metabolism (invertebrates, cytosol)	2.48e-28	1.43e-28	0.122776
CALVIN-PWY: Calvin-Benson-Bassham cycle	6.89e-31	4.59e-31	0.121808
PWY-1269: CMP-3-deoxy-D-manno-octulosonate biosynthesis I	4.61e-34	3.4e-34	0.12098
PWY-7208: superpathway of pyrimidine nucleobases salvage	2.13e-29	1.34e-29	0.117757
PWY-7209: superpathway of pyrimidine ribonucleosides degradation	4.67e-42	4.46e-42	0.11532
PWY66-422: D-galactose degradation V (Leloir pathway)	6.62e-33	4.71e-33	0.113236
PWY-7400: L-arginine biosynthesis IV (archaebacteria)	4.31e-29	2.62e-29	0.109915
PWY-5097: L-lysine biosynthesis VI	3.45e-30	2.26e-30	0.108122
PWY-5667: CDP-diacylglycerol biosynthesis I	1.31e-28	7.62e-29	0.106155
PWY0-1319: CDP-diacylglycerol biosynthesis II	1.3e-28	7.62e-29	0.106136
DENOVOPURINE2-PWY: superpathway of purine nucleotides de novo biosynthesis II	8.81e-32	6.07e-32	0.102588
PWY-7323: superpathway of GDP-mannose-derived O-antigen building blocks biosynthesis	4.97e-30	3.21e-30	0.102577
ARGSYN-PWY: L-arginine biosynthesis I (via L-ornithine)	3.68e-27	2.01e-27	0.0993124
PWY-5103: L-isoleucine biosynthesis III	1.32e-24	6.7e-25	0.0991207
PWY-621: sucrose degradation III (sucrose invertase)	7.09e-29	4.26e-29	0.09872
PWY-6606: guanosine nucleotides degradation II	2.99e-41	2.62e-41	0.0972569
BRANCHED-CHAIN-AA-SYN-PWY: superpathway of branched amino acid biosynthesis	9.25e-23	4.27e-23	0.0959185
PWY-7357: thiamin formation from pyrithiamine and oxythiamine (yeast)	2.05e-29	1.31e-29	0.0957895
PWY-6527: stachyose degradation	6.82e-28	3.87e-28	0.0942751
THISYNARA-PWY: superpathway of thiamin diphosphate biosynthesis III (eukaryotes)	3.31e-21	1.45e-21	0.0903763
PWY-7003: glycerol degradation to butanol	6.75e-19	2.73e-19	0.0870571
THRESYN-PWY: superpathway of L-threonine biosynthesis	3.58e-21	1.55e-21	0.0868973
TRPSYN-PWY: L-tryptophan biosynthesis	6.87e-24	3.39e-24	0.0836602
PWY-841: superpathway of purine nucleotides de novo biosynthesis I	7.77e-23	3.63e-23	0.0820021
P185-PWY: formaldehyde assimilation III (dihydroxyacetone cycle)	1.69e-23	8.14e-24	0.0813923
PWY-5121: superpathway of geranylgeranyl diphosphate biosynthesis II (via MEP)	4.51e-25	2.37e-25	0.080943
PWY0-1296: purine ribonucleosides degradation	2.31e-24	1.16e-24	0.0808207
FAO-PWY: fatty acid &beta;-oxidation I	3.6e-27	1.99e-27	0.0798587
PYRIDNUCSAL-PWY: NAD salvage pathway I	8.82e-24	4.31e-24	0.0789671
PWY-5136: fatty acid &beta;-oxidation II (peroxisome)	1.69e-27	9.47e-28	0.075204
ANAEROFRUCAT-PWY: homolactic fermentation	5.56e-17	1.98e-17	0.0745011
PWY-7187: pyrimidine deoxyribonucleotides de novo biosynthesis II	3.64e-25	1.93e-25	0.0744078
PWY-6588: pyruvate fermentation to acetone	9.34e-25	4.84e-25	0.0742483
SER-GLYSYN-PWY: superpathway of L-serine and glycine biosynthesis I	5.59e-18	2.1e-18	0.0730308
PWY-6471: peptidoglycan biosynthesis IV (Enterococcus faecium)	3.05e-23	1.46e-23	0.0721699
FERMENTATION-PWY: mixed acid fermentation	7.73e-20	3.25e-20	0.0713265
PWY-241: C4 photosynthetic carbon assimilation cycle, NADP-ME type	1.27e-21	5.63e-22	0.0707414
PWY-6737: starch degradation V	1.07e-17	3.97e-18	0.0691301
PWY-6595: superpathway of guanosine nucleotides degradation (plants)	1.05e-22	4.8e-23	0.0680302
PWY-6609: adenine and adenosine salvage III	1.74e-12	5.09e-13	0.0667098
UDPNAGSYN-PWY: UDP-N-acetyl-D-glucosamine biosynthesis I	2.59e-29	1.6e-29	0.0664944
FOLSYN-PWY: superpathway of tetrahydrofolate biosynthesis and salvage	2.95e-19	1.21e-19	0.0635239
PWY-6151: S-adenosyl-L-methionine cycle I	2.29e-15	7.5e-16	0.0634574
PWY-7219: adenosine ribonucleotides de novo biosynthesis	4.97e-18	1.88e-18	0.0632729
PWY-7184: pyrimidine deoxyribonucleotides de novo biosynthesis I	5.07e-16	1.7e-16	0.0627195
PWY66-400: glycolysis VI (metazoan)	2.06e-16	7.27e-17	0.0625704
PWY-7237: myo-, chiro- and scillo-inositol degradation	7.28e-07	1.45e-07	0.0594282
HISDEG-PWY: L-histidine degradation I	1.33e-14	4.15e-15	0.0564604
PHOSLIPSYN-PWY: superpathway of phospholipid biosynthesis I (bacteria)	2.77e-12	8.03e-13	0.0555247
PWY-6612: superpathway of tetrahydrofolate biosynthesis	2.49e-19	1.04e-19	0.0548106
PWY-6270: isoprene biosynthesis I	5.05e-20	2.14e-20	0.0530228
COA-PWY-1: coenzyme A biosynthesis II (mammalian)	2.08e-16	7.29e-17	0.0526946
COA-PWY: coenzyme A biosynthesis I	5e-16	1.69e-16	0.0524784
PWY-7560: methylerythritol phosphate pathway II	1.95e-20	8.35e-21	0.0511087
P162-PWY: L-glutamate degradation V (via hydroxyglutarate)	5.67e-10	1.41e-10	0.0509475
P108-PWY: pyruvate fermentation to propanoate I	1.63e-18	6.46e-19	0.0501966
PWY-7282: 4-amino-2-methyl-5-phosphomethylpyrimidine biosynthesis (yeast)	2.55e-13	7.7e-14	0.0500593
CRNFORCAT-PWY: creatinine degradation I	3.59e-10	9.09e-11	0.0500058
PWY-7221: guanosine ribonucleotides de novo biosynthesis	2.79e-13	8.37e-14	0.0497995
PWY66-409: superpathway of purine nucleotide salvage	6.27e-16	2.09e-16	0.0484602
PWY-6263: superpathway of menaquinol-8 biosynthesis II	5.18e-15	1.69e-15	0.0481983
ARGSYNBSUB-PWY: L-arginine biosynthesis II (acetyl cycle)	2.78e-17	1.01e-17	0.0478873
PWY-5100: pyruvate fermentation to acetate and lactate II	4.37e-23	2.06e-23	0.047582
PWY-7392: taxadiene biosynthesis (engineered)	1.27e-14	4e-15	0.0462703
GOLPDLCAT-PWY: superpathway of glycerol degradation to 1,3-propanediol	1.26e-08	2.97e-09	0.045424
PWY-4702: phytate degradation I	4.69e-13	1.4e-13	0.0454213
PWY-6353: purine nucleotides degradation II (aerobic)	1.16e-24	5.93e-25	0.0453189
PWY66-398: TCA cycle III (animals)	1.48e-07	3.17e-08	0.0452631
PWY-821: superpathway of sulfur amino acid biosynthesis (Saccharomyces cerevisiae)	4.26e-10	1.07e-10	0.0450669
NONOXIPENT-PWY: pentose phosphate pathway (non-oxidative branch)	1.38e-15	4.57e-16	0.0443057
PWY-724: superpathway of L-lysine, L-threonine and L-methionine biosynthesis II	1.36e-10	3.47e-11	0.044186
COLANSYN-PWY: colanic acid building blocks biosynthesis	7.6e-12	2.09e-12	0.0435581
PWY-1861: formaldehyde assimilation II (RuMP Cycle)	1.14e-31	7.72e-32	0.043533
P461-PWY: hexitol fermentation to lactate, formate, ethanol and acetate	6.39e-13	1.89e-13	0.040954
P441-PWY: superpathway of N-acetylneuraminate degradation	4.66e-12	1.31e-12	0.0407335
PWY-922: mevalonate pathway I	7.56e-22	3.38e-22	0.0400471
PWY-6415: L-ascorbate biosynthesis V	2.08e-17	7.66e-18	0.0395332
PWY-5345: superpathway of L-methionine biosynthesis (by sulfhydrylation)	6.15e-09	1.49e-09	0.0394333
P164-PWY: purine nucleobases degradation I (anaerobic)	3.57e-09	8.77e-10	0.0388533
PWY-5910: superpathway of geranylgeranyldiphosphate biosynthesis I (via mevalonate)	1.7e-18	6.67e-19	0.0375331
CITRULBIO-PWY: L-citrulline biosynthesis	4.33e-12	1.24e-12	0.0372458
CENTFERM-PWY: pyruvate fermentation to butanoate	4.04e-05	6.31e-06	0.0357466
PWY-6590: superpathway of Clostridium acetobutylicum acidogenic fermentation	3.91e-05	6.16e-06	0.0355577
PWY-7210: pyrimidine deoxyribonucleotides biosynthesis from CTP	3.09e-05	4.93e-06	0.0352045
PWY-7198: pyrimidine deoxyribonucleotides de novo biosynthesis IV	3.33e-05	5.3e-06	0.0348938
PWY-5676: acetyl-CoA fermentation to butanoate II	2.06e-08	4.75e-09	0.0345461
PWY0-1479: tRNA processing	2.97e-16	1.02e-16	0.034319
PWY-5189: tetrapyrrole biosynthesis II (from glycine)	2.41e-16	8.35e-17	0.0343174
PWY-6549: L-glutamine biosynthesis III	1.01e-06	1.96e-07	0.0329391
PWY0-1297: superpathway of purine deoxyribonucleosides degradation	1.22e-11	3.32e-12	0.0328796
FUCCAT-PWY: fucose degradation	1.91e-25	1.03e-25	0.0320311
PWY-5367: petroselinate biosynthesis	6.9e-12	1.91e-12	0.0319898
PWY-7196: superpathway of pyrimidine ribonucleosides salvage	6.65e-12	1.85e-12	0.0318441
PWY-4984: urea cycle	1.12e-10	2.88e-11	0.0315972
PWY-4242: pantothenate and coenzyme A biosynthesis III	5.26e-09	1.29e-09	0.0314702
GLYCOGENSYNTH-PWY: glycogen biosynthesis I (from ADP-D-Glucose)	2.59e-18	9.96e-19	0.0313038
PWY-7399: methylphosphonate degradation II	4.42e-12	1.26e-12	0.0310997
RUMP-PWY: formaldehyde oxidation I	4.43e-22	2e-22	0.0300694
PWY-5177: glutaryl-CoA degradation	1.18e-11	3.22e-12	0.030033
PWY-7371: 1,4-dihydroxy-6-naphthoate biosynthesis II	1.07e-14	3.46e-15	0.029786
PWY-7115: C4 photosynthetic carbon assimilation cycle, NAD-ME type	4.78e-14	1.48e-14	0.0296064
PWY4LZ-257: superpathway of fermentation (Chlamydomonas reinhardtii)	2.6e-07	5.44e-08	0.0294481
PWY-561: superpathway of glyoxylate cycle and fatty acid degradation	3.47e-06	6.37e-07	0.0294396
GLUTORN-PWY: L-ornithine biosynthesis	4.01e-16	1.37e-16	0.029309
VALSYN-PWY: L-valine biosynthesis	1.36e-08	3.2e-09	0.0291838
ILEUSYN-PWY: L-isoleucine biosynthesis I (from threonine)	1.49e-08	3.49e-09	0.0287493
ARG+POLYAMINE-SYN: superpathway of arginine and polyamine biosynthesis	9.8e-19	3.92e-19	0.0282772
PWY-7211: superpathway of pyrimidine deoxyribonucleotides de novo biosynthesis	1.56e-07	3.33e-08	0.0279923
PWY-6167: flavin biosynthesis II (archaea)	1.35e-09	3.34e-10	0.0268462
PWY-5464: superpathway of cytosolic glycolysis (plants), pyruvate dehydrogenase and TCA cycle	9.66e-06	1.68e-06	0.0267138
PWY-5941: glycogen degradation II (eukaryotic)	0.00717784	0.000851608	0.0265665
PWY-7111: pyruvate fermentation to isobutanol (engineered)	6.76e-08	1.49e-08	0.0263103
PWY-5659: GDP-mannose biosynthesis	3.62e-05	5.74e-06	0.0258871
P161-PWY: acetylene degradation	6.96e-09	1.67e-09	0.0253593
PWY66-399: gluconeogenesis III	1.34e-06	2.54e-07	0.0247343
PWY-5692: allantoin degradation to glyoxylate II	1.6e-05	2.69e-06	0.0243936
URDEGR-PWY: superpathway of allantoin degradation in plants	1.6e-05	2.69e-06	0.0243936
PWY0-1261: anhydromuropeptides recycling	8.69e-11	2.25e-11	0.0243276
DTDPRHAMSYN-PWY: dTDP-L-rhamnose biosynthesis I	2.19e-07	4.62e-08	0.0234254
COBALSYN-PWY: adenosylcobalamin salvage from cobinamide I	5.36e-12	1.5e-12	0.0233658
PWY-5005: biotin biosynthesis II	3.16e-11	8.46e-12	0.0230203
HEME-BIOSYNTHESIS-II: heme biosynthesis I (aerobic)	4.99e-06	8.99e-07	0.0229981
PWY3O-19: ubiquinol-6 biosynthesis from 4-hydroxybenzoate (eukaryotic)	1.39e-12	4.07e-13	0.0225265
PWY-6531: mannitol cycle	0.000738148	9.6e-05	0.0222589
PWY-6608: guanosine nucleotides degradation III	2.46e-18	9.56e-19	0.0218701
PWY4FS-8: phosphatidylglycerol biosynthesis II (non-plastidic)	1.01e-08	2.39e-09	0.021827
PWY4FS-7: phosphatidylglycerol biosynthesis I (plastidic)	1.01e-08	2.39e-09	0.0218255
PWY-6731: starch degradation III	5.43e-14	1.66e-14	0.0217771
PWY-5656: mannosylglycerate biosynthesis I	7.14e-08	1.56e-08	0.0216729
PWY-1042: glycolysis IV (plant cytosol)	1.22e-06	2.32e-07	0.021341
SULFATE-CYS-PWY: superpathway of sulfate assimilation and cysteine biosynthesis	1.86e-05	3.07e-06	0.0213197
THISYN-PWY: superpathway of thiamin diphosphate biosynthesis I	8.01e-06	1.41e-06	0.0212959
PWY-5030: L-histidine degradation III	0.00147267	0.000186864	0.0212514
PWY0-162: superpathway of pyrimidine ribonucleotides de novo biosynthesis	9.65e-08	2.08e-08	0.0210146
PWY-5913: TCA cycle VI (obligate autotrophs)	2.08e-13	6.32e-14	0.0208883
P105-PWY: TCA cycle IV (2-oxoglutarate decarboxylase)	3.96e-07	8.07e-08	0.0208196
PWY-7235: superpathway of ubiquinol-6 biosynthesis (eukaryotic)	2.69e-08	6.13e-09	0.0203591
PWY-5088: L-glutamate degradation VIII (to propanoate)	1.72e-11	4.62e-12	0.020334
PWY-5198: factor 420 biosynthesis	4.07e-17	1.46e-17	0.0202753
BIOTIN-BIOSYNTHESIS-PWY: biotin biosynthesis I	2.62e-08	6.02e-09	0.0201038
HEXITOLDEGSUPER-PWY: superpathway of hexitol degradation (bacteria)	1.58e-05	2.68e-06	0.0200303
7ALPHADEHYDROX-PWY: cholate degradation (bacteria, anaerobic)	0.000369064	5.05e-05	0.0197363
PWY-5101: L-isoleucine biosynthesis II	0.0149516	0.00171576	0.0191556
PWY-7117: C4 photosynthetic carbon assimilation cycle, PEPCK type	3.7e-18	1.41e-18	0.018652
HCAMHPDEG-PWY: 3-phenylpropanoate and 3-(3-hydroxyphenyl)propanoate degradation to 2-oxopent-4-enoate	4.57e-07	9.19e-08	0.018028
PWY-6690: cinnamate and 3-hydroxycinnamate degradation to 2-oxopent-4-enoate	4.57e-07	9.19e-08	0.018028
PWY-6124: inosine-5'-phosphate biosynthesis II	5.77e-05	8.79e-06	0.017971
PWY-7539: 6-hydroxymethyl-dihydropterin diphosphate biosynthesis III (Chlamydia)	0.00736562	0.000868978	0.0179397
REDCITCYC: TCA cycle VIII (helicobacter)	3.21e-07	6.65e-08	0.0178179
GLUCONEO-PWY: gluconeogenesis I	5.58e-09	1.35e-09	0.0176669
PWY-5138: unsaturated, even numbered fatty acid &beta;-oxidation	7.74e-05	1.15e-05	0.0176349
PWY-6895: superpathway of thiamin diphosphate biosynthesis II	1.23e-05	2.13e-06	0.017521
PWY-5104: L-isoleucine biosynthesis IV	4.27e-11	1.13e-11	0.0174383
RIBOSYN2-PWY: flavin biosynthesis I (bacteria and plants)	0.000105024	1.51e-05	0.0170013
PWY0-166: superpathway of pyrimidine deoxyribonucleotides de novo biosynthesis (E. coli)	5.91e-05	8.96e-06	0.0169314
PWY0-1277: 3-phenylpropanoate and 3-(3-hydroxyphenyl)propanoate degradation	1.37e-06	2.6e-07	0.0166887
PWY0-1586: peptidoglycan maturation (meso-diaminopimelate containing)	0.00729058	0.000862547	0.01664
PWY-6123: inosine-5'-phosphate biosynthesis I	0.000302477	4.19e-05	0.016264
PWY-5173: superpathway of acetyl-CoA biosynthesis	1.03e-06	1.98e-07	0.0162207
PWY-6859: all-trans-farnesol biosynthesis	6.97e-11	1.84e-11	0.0161716
GALACTARDEG-PWY: D-galactarate degradation I	9.72e-07	1.89e-07	0.0161225
GLUCARGALACTSUPER-PWY: superpathway of D-glucarate and D-galactarate degradation	9.72e-07	1.89e-07	0.0161225
METHANOGENESIS-PWY: methanogenesis from H2 and CO2	3.35e-19	1.37e-19	0.0158869
GLYOXYLATE-BYPASS: glyoxylate cycle	2.26e-07	4.74e-08	0.0158598
PWY-6138: CMP-N-acetylneuraminate biosynthesis I (eukaryotes)	4.41e-07	8.95e-08	0.0158409
PWY-6519: 8-amino-7-oxononanoate biosynthesis I	9.09e-08	1.98e-08	0.0158353
PWY-5897: superpathway of menaquinol-11 biosynthesis	4.54e-05	7.01e-06	0.0157827
PWY-5898: superpathway of menaquinol-12 biosynthesis	4.54e-05	7.01e-06	0.0157827
PWY-5899: superpathway of menaquinol-13 biosynthesis	4.54e-05	7.01e-06	0.0157827
PWY0-321: phenylacetate degradation I (aerobic)	9.51e-06	1.66e-06	0.0156557
SALVADEHYPOX-PWY: adenosine nucleotides degradation II	2.79e-17	1.01e-17	0.0156308
FASYN-ELONG-PWY: fatty acid elongation -- saturated	6.81e-08	1.5e-08	0.0156232
P23-PWY: reductive TCA cycle I	7.74e-11	2.03e-11	0.0155623
PWY0-1061: superpathway of L-alanine biosynthesis	1.12e-06	2.14e-07	0.015448
PWY-7286: 7-(3-amino-3-carboxypropyl)-wyosine biosynthesis	1.22e-14	3.9e-15	0.0153425
GLYCOLYSIS-TCA-GLYOX-BYPASS: superpathway of glycolysis, pyruvate dehydrogenase, TCA, and glyoxylate bypass	3.84e-07	7.87e-08	0.0148959
PWY0-1533: methylphosphonate degradation I	2.91e-05	4.66e-06	0.0147422
ENTBACSYN-PWY: enterobactin biosynthesis	0.000547099	7.34e-05	0.014637
AST-PWY: L-arginine degradation II (AST pathway)	9.19e-05	1.33e-05	0.0141727
PWY-5838: superpathway of menaquinol-8 biosynthesis I	9.07e-06	1.59e-06	0.0141211
PWY-7254: TCA cycle VII (acetate-producers)	2.8e-07	5.81e-08	0.0140561
GLUCARDEG-PWY: D-glucarate degradation I	8.31e-07	1.64e-07	0.0140225
PWY-6892: thiazole biosynthesis I (E. coli)	2.44e-05	3.94e-06	0.0139035
PWY-5840: superpathway of menaquinol-7 biosynthesis	1.26e-05	2.17e-06	0.0137733
PWY-6174: mevalonate pathway II (archaea)	7.5e-06	1.33e-06	0.0135735
NONMEVIPP-PWY: methylerythritol phosphate pathway I	0.000222549	3.13e-05	0.0134973
PWY-6628: superpathway of L-phenylalanine biosynthesis	2.13e-05	3.47e-06	0.0134668
AEROBACTINSYN-PWY: aerobactin biosynthesis	5.03e-10	1.26e-10	0.0134618
PWY-3781: aerobic respiration I (cytochrome c)	3.91e-06	7.15e-07	0.013351
PWY-7664: oleate biosynthesis IV (anaerobic)	1.8e-07	3.81e-08	0.013336
PWY-7391: isoprene biosynthesis II (engineered)	1.72e-08	3.99e-09	0.0133161
3-HYDROXYPHENYLACETATE-DEGRADATION-PWY: 4-hydroxyphenylacetate degradation	2.91e-08	6.61e-09	0.0133151
PPGPPMET-PWY: ppGpp biosynthesis	0.00461592	0.000555497	0.0128178
PWY1F-823: leucopelargonidin and leucocyanidin biosynthesis	1.61e-10	4.1e-11	0.0127554
POLYAMSYN-PWY: superpathway of polyamine biosynthesis I	3.4e-08	7.64e-09	0.0124617
PWY-7197: pyrimidine deoxyribonucleotide phosphorylation	0.00133944	0.000170992	0.0123796
TCA-GLYOX-BYPASS: superpathway of glyoxylate bypass and TCA	1.4e-06	2.63e-07	0.0123683
PWY-6285: superpathway of fatty acids biosynthesis (E. coli)	0.0444952	0.00485402	0.0123549
PWY-5861: superpathway of demethylmenaquinol-8 biosynthesis	1.72e-05	2.86e-06	0.0122457
FUC-RHAMCAT-PWY: superpathway of fucose and rhamnose degradation	2.07e-06	3.83e-07	0.0120317
PWY-6282: palmitoleate biosynthesis I (from (5Z)-dodec-5-enoate)	9.16e-07	1.8e-07	0.0120058
P42-PWY: incomplete reductive TCA cycle	0.0168964	0.00192316	0.0119141
PWY-6630: superpathway of L-tyrosine biosynthesis	5.47e-05	8.36e-06	0.0117877
PWY-7204: pyridoxal 5'-phosphate salvage II (plants)	5.92e-06	1.06e-06	0.0114728
PWY-7242: D-fructuronate degradation	0.00216762	0.000268555	0.0112943
PWY-6507: 4-deoxy-L-threo-hex-4-enopyranuronate degradation	4.69e-06	8.49e-07	0.0112857
PWY-6785: hydrogen production VIII	1.62e-05	2.71e-06	0.0112494
PWY-5154: L-arginine biosynthesis III (via N-acetyl-L-citrulline)	6.07e-07	1.21e-07	0.0112306
PWY-7456: mannan degradation	8.49e-11	2.21e-11	0.0110503
PWY-6901: superpathway of glucose and xylose degradation	0.000169852	2.4e-05	0.0108237
GLUCUROCAT-PWY: superpathway of &beta;-D-glucuronide and D-glucuronate degradation	0.0076122	0.000893052	0.0107463
PWY0-862: (5Z)-dodec-5-enoate biosynthesis	1.96e-06	3.64e-07	0.0105766
PWY-5417: catechol degradation III (ortho-cleavage pathway)	8.31e-05	1.23e-05	0.0105743
PWY-5431: aromatic compounds degradation via &beta;-ketoadipate	8.31e-05	1.23e-05	0.0105743
GALACT-GLUCUROCAT-PWY: superpathway of hexuronide and hexuronate degradation	0.012163	0.00140342	0.010382
PWY-7279: aerobic respiration II (cytochrome c) (yeast)	7.65e-05	1.14e-05	0.0103756
PWY0-1415: superpathway of heme biosynthesis from uroporphyrinogen-III	0.000718055	9.37e-05	0.0103286
PWY-5918: superpathay of heme biosynthesis from glutamate	0.00010265	1.48e-05	0.0103124
PWY-7269: NAD/NADP-NADH/NADPH mitochondrial interconversion (yeast)	2.08e-05	3.41e-06	0.0100624
ARGDEG-PWY: superpathway of L-arginine, putrescine, and 4-aminobutanoate degradation	2.43e-05	3.94e-06	0.010018
ORNARGDEG-PWY: superpathway of L-arginine and L-ornithine degradation	2.43e-05	3.94e-06	0.010018
PWY-6562: norspermidine biosynthesis	0.000340513	4.7e-05	0.010004
PWY-5845: superpathway of menaquinol-9 biosynthesis	6.16e-05	9.23e-06	0.00997315
PWY-5850: superpathway of menaquinol-6 biosynthesis I	6.16e-05	9.23e-06	0.00997315
PWY-5896: superpathway of menaquinol-10 biosynthesis	6.16e-05	9.23e-06	0.00997315
PWY-5989: stearate biosynthesis II (bacteria and plants)	0.00413428	0.000501849	0.00989576
PWY-101: photosynthesis light reactions	1.57e-05	2.67e-06	0.00989394
TEICHOICACID-PWY: teichoic acid (poly-glycerol) biosynthesis	0.000343329	4.73e-05	0.00987497
SO4ASSIM-PWY: sulfate reduction I (assimilatory)	0.0111768	0.00129319	0.00971494
PWYG-321: mycolate biosynthesis	1.42e-05	2.43e-06	0.00969304
PWY-7446: sulfoglycolysis	2.39e-06	4.39e-07	0.00964336
PWY-6823: molybdenum cofactor biosynthesis	0.000838739	0.000108391	0.00954423
PWY-6470: peptidoglycan biosynthesis V (&beta;-lactam resistance)	0.000434571	5.89e-05	0.00941993
PWY-6891: thiazole biosynthesis II (Bacillus)	5.02e-05	7.73e-06	0.00918261
PWY-3661: glycine betaine degradation I	0.0012401	0.000159279	0.00908677
PWY-6897: thiamin salvage II	0.0498198	0.00542081	0.00891308
ALL-CHORISMATE-PWY: superpathway of chorismate metabolism	0.0155982	0.00178023	0.00882195
GLYCOLYSIS-E-D: superpathway of glycolysis and Entner-Doudoroff	0.000494316	6.65e-05	0.00880554
PWY-7332: superpathway of UDP-N-acetylglucosamine-derived O-antigen building blocks biosynthesis	0.00331392	0.000404606	0.0086656
PWY0-1338: polymyxin resistance	8.98e-05	1.31e-05	0.00866017
FASYN-INITIAL-PWY: superpathway of fatty acid biosynthesis initiation (E. coli)	3.54e-07	7.29e-08	0.00835831
PWY-5860: superpathway of demethylmenaquinol-6 biosynthesis I	8.62e-05	1.26e-05	0.00832295
PWY-5862: superpathway of demethylmenaquinol-9 biosynthesis	8.62e-05	1.26e-05	0.00832295
P562-PWY: myo-inositol degradation I	0.0105437	0.00122669	0.00832073
NAGLIPASYN-PWY: lipid IVA biosynthesis	0.000161179	2.29e-05	0.00819962
PWY-7315: dTDP-N-acetylthomosamine biosynthesis	0.00011892	1.7e-05	0.00819643
PWY-5855: ubiquinol-7 biosynthesis (prokaryotic)	0.000557135	7.38e-05	0.00817755
PWY-5856: ubiquinol-9 biosynthesis (prokaryotic)	0.000557135	7.38e-05	0.00817755
PWY-5857: ubiquinol-10 biosynthesis (prokaryotic)	0.000557135	7.38e-05	0.00817755
PWY-6708: ubiquinol-8 biosynthesis (prokaryotic)	0.000557135	7.38e-05	0.00817755
ANAGLYCOLYSIS-PWY: glycolysis III (from glucose)	0.0025796	0.000317721	0.00814953
POLYISOPRENSYN-PWY: polyisoprenoid biosynthesis (E. coli)	4.47e-06	8.12e-07	0.00813003
P124-PWY: Bifidobacterium shunt	0.215297	0.0206922	0.00812302
GLUDEG-I-PWY: GABA shunt	1.28e-14	4e-15	0.00800309
PWY0-1241: ADP-L-glycero-&beta;-D-manno-heptose biosynthesis	0.000584682	7.7e-05	0.00794931
NAD-BIOSYNTHESIS-II: NAD salvage pathway II	3.47e-12	9.98e-13	0.00780271
ECASYN-PWY: enterobacterial common antigen biosynthesis	9.06e-05	1.32e-05	0.00772832
PWY-7200: superpathway of pyrimidine deoxyribonucleoside salvage	0.0438354	0.0047945	0.00758103
CATECHOL-ORTHO-CLEAVAGE-PWY: catechol degradation to &beta;-ketoadipate	0.000126662	1.81e-05	0.00748449
PWY-6876: isopropanol biosynthesis	2.87e-05	4.62e-06	0.0073939
UBISYN-PWY: superpathway of ubiquinol-8 biosynthesis (prokaryotic)	0.000622985	8.18e-05	0.00735647
VALDEG-PWY: L-valine degradation I	0.0150418	0.0017214	0.00726859
PANTOSYN-PWY: pantothenate and coenzyme A biosynthesis I	0.0100591	0.00117357	0.00726113
PWY-7389: superpathway of anaerobic energy metabolism (invertebrates)	0.0203828	0.00230129	0.00723587
PWY-5180: toluene degradation I (aerobic) (via o-cresol)	0.00203464	0.000252825	0.00713953
PWY-5182: toluene degradation II (aerobic) (via 4-methylcatechol)	0.00203464	0.000252825	0.00713953
PWY-5083: NAD/NADH phosphorylation and dephosphorylation	0.0025929	0.000318426	0.00712697
PWY0-1298: superpathway of pyrimidine deoxyribonucleosides degradation	3.98e-08	8.89e-09	0.00707021
PWY-4041: &gamma;-glutamyl cycle	8.3e-06	1.46e-06	0.00706761
GLUCOSE1PMETAB-PWY: glucose and glucose-1-phosphate degradation	1.82e-05	3.03e-06	0.00702433
PWY-5179: toluene degradation V (aerobic) (via toluene-cis-diol)	1.96e-05	3.23e-06	0.00693506
PWY-7388: octanoyl-[acyl-carrier protein] biosynthesis (mitochondria, yeast)	7.69e-07	1.52e-07	0.00693096
KDO-NAGLIPASYN-PWY: superpathway of (Kdo)2-lipid A biosynthesis	0.00183896	0.000231247	0.00690572
PWY-7384: anaerobic energy metabolism (invertebrates, mitochondrial)	0.0205549	0.00231449	0.00685016
TYRFUMCAT-PWY: L-tyrosine degradation I	0.00023724	3.32e-05	0.00678008
PWY-5791: 1,4-dihydroxy-2-naphthoate biosynthesis II (plants)	0.000300265	4.18e-05	0.00675745
PWY-5837: 1,4-dihydroxy-2-naphthoate biosynthesis I	0.000300265	4.18e-05	0.00675745
GALACTUROCAT-PWY: D-galacturonate degradation I	0.00444653	0.00053665	0.00672332
PWY-5505: L-glutamate and L-glutamine biosynthesis	0.000690232	9.03e-05	0.00657172
PWY-5004: superpathway of L-citrulline metabolism	4.04e-05	6.31e-06	0.00651842
PWY-5872: ubiquinol-10 biosynthesis (eukaryotic)	0.070651	0.00739986	0.00647567
PWY-7118: chitin degradation to ethanol	0.0267773	0.00299108	0.0063431
PWY-6145: superpathway of sialic acids and CMP-sialic acids biosynthesis	0.476637	0.0425026	0.00622947
PWY-5971: palmitate biosynthesis II (bacteria and plants)	0.0269278	0.00299992	0.00619954
KETOGLUCONMET-PWY: ketogluconate metabolism	1.55e-06	2.91e-07	0.00615122
PWY-5067: glycogen biosynthesis II (from UDP-D-Glucose)	0.0968555	0.0100195	0.00612289
PWY-7345: superpathway of anaerobic sucrose degradation	0.0563054	0.00606366	0.00604806
PWY-3801: sucrose degradation II (sucrose synthase)	0.0563054	0.00606366	0.00603536
PWY66-389: phytol degradation	9.34e-08	2.02e-08	0.00593406
PWY-7218: photosynthetic 3-hydroxybutanoate biosynthesis (engineered)	0.0177683	0.00201151	0.00592521
PHOTOALL-PWY: oxygenic photosynthesis	0.0177683	0.00201151	0.00592336
GLCMANNANAUT-PWY: superpathway of N-acetylglucosamine, N-acetylmannosamine and N-acetylneuraminate degradation	0.208532	0.0200879	0.00588764
PWY-7546: diphthamide biosynthesis (eukaryotes)	0.070651	0.00739986	0.00580285
PWY-2723: trehalose degradation V	3.91e-05	6.16e-06	0.00577653
P125-PWY: superpathway of (R,R)-butanediol biosynthesis	0.00485969	0.000583163	0.00573287
PWY-7294: xylose degradation IV	0.0362546	0.00401766	0.00562352
PWY-6113: superpathway of mycolate biosynthesis	0.0905085	0.00940929	0.00541979
PWY-6185: 4-methylcatechol degradation (ortho cleavage)	7e-06	1.25e-06	0.00537938
PWY-5028: L-histidine degradation II	0.00143866	0.000183102	0.00537662
PWY-5863: superpathway of phylloquinol biosynthesis	0.00157419	0.000199144	0.00525896
PENTOSE-P-PWY: pentose phosphate pathway	0.00439	0.000531355	0.00525817
PWY-6660: 2-heptyl-3-hydroxy-4(1H)-quinolone biosynthesis	0.0004154	5.66e-05	0.00523845
PWY-5920: superpathway of heme biosynthesis from glycine	0.0239943	0.00269455	0.00518431
PWY-7619: juniperonate biosynthesis	0.0697645	0.00736292	0.00500954
PWY-6981: chitin biosynthesis	0.237566	0.0226253	0.00490863
PWY-6662: superpathway of quinolone and alkylquinolone biosynthesis	0.00123668	0.000159279	0.00488712
PWY-6803: phosphatidylcholine acyl editing	7.72e-05	1.15e-05	0.00482527
ALLANTOINDEG-PWY: superpathway of allantoin degradation in yeast	5.09e-05	7.8e-06	0.0047616
PWY-7328: superpathway of UDP-glucose-derived O-antigen building blocks biosynthesis	1.57e-05	2.67e-06	0.00469785
P221-PWY: octane oxidation	0.148196	0.0150708	0.00466863
PWY-5129: sphingolipid biosynthesis (plants)	0.0697724	0.00736292	0.00466247
PWY-5080: very long chain fatty acid biosynthesis I	0.0697645	0.00736292	0.00462302
PWY-6598: sciadonate biosynthesis	0.0697645	0.00736292	0.00462302
PWY-7031: protein N-glycosylation (bacterial)	0.058356	0.00623652	0.00453264
HEMESYN2-PWY: heme biosynthesis II (anaerobic)	0.139678	0.0142737	0.00448058
PWY-6629: superpathway of L-tryptophan biosynthesis	0.0137912	0.00158693	0.00445952
PWY490-3: nitrate reduction VI (assimilatory)	0.133337	0.0136923	0.00441702
PWY-7420: monoacylglycerol metabolism (yeast)	0.221765	0.0212652	0.00415937
PWY-5381: pyridine nucleotide cycling (plants)	0.170013	0.0169207	0.00410944
PWY-5651: L-tryptophan degradation to 2-amino-3-carboxymuconate semialdehyde	0.20012	0.0193639	0.00406942
NADSYN-PWY: NAD biosynthesis II (from tryptophan)	0.20012	0.0193639	0.0040692
ORNDEG-PWY: superpathway of ornithine degradation	5.1e-06	9.15e-07	0.00406787
PWY-3502: superpathway of NAD biosynthesis in eukaryotes	0.20012	0.0193639	0.00406327
PROPFERM-PWY: L-alanine fermentation to propanoate and acetate	0.058356	0.00623652	0.00405
PWY0-881: superpathway of fatty acid biosynthesis I (E. coli)	0.00369723	0.000450098	0.0039884
PWY0-41: allantoin degradation IV (anaerobic)	0.00191603	0.000239504	0.00398024
PWY1G-0: mycothiol biosynthesis	0.000480934	6.49e-05	0.00388983
GLYCOCAT-PWY: glycogen degradation I (bacterial)	0.00130619	0.000167256	0.00377832
PWY-5022: 4-aminobutanoate degradation V	1.96e-06	3.64e-07	0.00376432
PWY-5044: purine nucleotides degradation I (plants)	0.0431015	0.00473891	0.00376265
PWY-6351: D-myo-inositol (1,4,5)-trisphosphate biosynthesis	0.170013	0.0169207	0.00373644
PWY-5306: superpathway of thiosulfate metabolism (Desulfovibrio sulfodismutans)	0.18627	0.0182825	0.00368634
PWY-6074: zymosterol biosynthesis	0.0873774	0.00910633	0.00362173
ERGOSTEROL-SYN-PWY: superpathway of ergosterol biosynthesis I	0.170013	0.0169207	0.00361531
PWY-7527: L-methionine salvage cycle III	0.0370944	0.00408914	0.00358298
PWY-6075: ergosterol biosynthesis I	0.0348829	0.00387588	0.00357616
PWY-7409: phospholipid remodeling (phosphatidylethanolamine, yeast)	0.000347614	4.77e-05	0.00356661
PEPTIDOGLYCANSYN-PWY: peptidoglycan biosynthesis I (meso-diaminopimelate containing)	0.283673	0.0260706	0.00355909
PWY-7374: 1,4-dihydroxy-6-naphthoate biosynthesis I	0.00663834	0.000789831	0.00346486
SPHINGOLIPID-SYN-PWY: sphingolipid biosynthesis (yeast)	0.222857	0.0213211	0.00343237
PWY-6284: superpathway of unsaturated fatty acids biosynthesis (E. coli)	0.223645	0.0213479	0.00337116
PWY-7245: superpathway NAD/NADP - NADH/NADPH interconversion (yeast)	0.0555747	0.00603136	0.00328325
PWY-6545: pyrimidine deoxyribonucleotides de novo biosynthesis III	0.124794	0.0128465	0.00326491
PWY-622: starch biosynthesis	3.36e-08	7.59e-09	0.00319281
PWY-6829: tRNA methylation (yeast)	0.169993	0.0169207	0.00313522
ARGORNPROST-PWY: arginine, ornithine and proline interconversion	0.00165068	0.000208193	0.00309613
PWY-5723: Rubisco shunt	0.000187662	2.64e-05	0.00307179
PWY-7039: phosphatidate metabolism, as a signaling molecule	0.0243951	0.00273225	0.00305399
PWY-7528: L-methionine salvage cycle I (bacteria and plants)	0.00742692	0.000873755	0.00305289
PWY-6596: adenosine nucleotides degradation I	0.043462	0.00476607	0.00304907
PWY-7385: 1,3-propanediol biosynthesis (engineered)	0.07464	0.00779821	0.00303408
PWY-6309: L-tryptophan degradation XI (mammalian, via kynurenine)	0.0973696	0.010048	0.00301914
PWY-7283: wybutosine biosynthesis	0.169993	0.0169207	0.00298051
P163-PWY: L-lysine fermentation to acetate and butanoate	1.28e-14	4e-15	0.00296302
PWY-5514: UDP-N-acetyl-D-galactosamine biosynthesis II	0.20012	0.0193639	0.00295006
PWY-6147: 6-hydroxymethyl-dihydropterin diphosphate biosynthesis I	0.000433108	5.89e-05	0.00287292
PWY-4361: S-methyl-5-thio-&alpha;-D-ribose 1-phosphate degradation	0.177967	0.0176705	0.00283467
PWY-5747: 2-methylcitrate cycle II	0.000784264	0.000101664	0.00283416
PWY-6269: adenosylcobalamin salvage from cobinamide II	0.058356	0.00623652	0.0028075
PWY-7268: NAD/NADP-NADH/NADPH cytosolic interconversion (yeast)	0.0557549	0.00603533	0.00277887
PWY-5705: allantoin degradation to glyoxylate III	0.00884858	0.00103521	0.00277462
PWY-5686: UMP biosynthesis	0.036363	0.00401906	0.00276097
PWY-2201: folate transformations I	0.169993	0.0169207	0.00274284
GLYCOL-GLYOXDEG-PWY: superpathway of glycol metabolism and degradation	0.00260069	0.000318451	0.00272553
PWY-7411: superpathway of phosphatidate biosynthesis (yeast)	0.0604065	0.00643927	0.00270391
PWY0-42: 2-methylcitrate cycle I	0.000567353	7.49e-05	0.00266891
PWY-6165: chorismate biosynthesis II (archaea)	0.000162052	2.3e-05	0.00265276
METH-ACETATE-PWY: methanogenesis from acetate	0.241884	0.0226766	0.00259707
P621-PWY: nylon-6 oligomer degradation	0.241884	0.0226766	0.00259707
PWY-5677: succinate fermentation to butanoate	0.241884	0.0226766	0.00259707
PWY-6071: superpathway of phenylethylamine degradation	0.241884	0.0226766	0.00259707
PWY-6143: CMP-pseudaminate biosynthesis	0.241884	0.0226766	0.00259707
THREOCAT-PWY: superpathway of L-threonine metabolism	0.241884	0.0226766	0.00259707
MANNOSYL-CHITO-DOLICHOL-BIOSYNTHESIS: protein N-glycosylation (eukaryotic, high mannose)	0.200555	0.0193639	0.00255165
PWY3O-355: stearate biosynthesis III (fungi)	0.169948	0.0169207	0.00253669
PWY-7090: UDP-2,3-diacetamido-2,3-dideoxy-&alpha;-D-mannuronate biosynthesis	0.259766	0.0239784	0.00246656
LEU-DEG2-PWY: L-leucine degradation I	0.259766	0.0239784	0.00246656
PWY-7165: L-ascorbate biosynthesis VI (engineered pathway)	0.259766	0.0239784	0.00246656
PWY-7238: sucrose biosynthesis II	0.259766	0.0239784	0.00246656
PWY-7347: sucrose biosynthesis III	0.259766	0.0239784	0.00246656
PWY-7431: aromatic biogenic amine degradation (bacteria)	0.259766	0.0239784	0.00246656
SUCSYN-PWY: sucrose biosynthesis I (from photosynthesis)	0.259766	0.0239784	0.00246656
TRIGLSYN-PWY: diacylglycerol and triacylglycerol biosynthesis	0.481198	0.0428185	0.00245148
METHGLYUT-PWY: superpathway of methylglyoxal degradation	0.00561186	0.000669596	0.00243796
PWY-5870: ubiquinol-8 biosynthesis (eukaryotic)	0.0934388	0.00968995	0.0024271
PWY-7373: superpathway of demethylmenaquinol-6 biosynthesis II	0.169971	0.0169207	0.0023836
PWY-5871: ubiquinol-9 biosynthesis (eukaryotic)	0.421903	0.037702	0.00237962
PWY-5873: ubiquinol-7 biosynthesis (eukaryotic)	0.421903	0.037702	0.00237962
UDPNACETYLGALSYN-PWY: UDP-N-acetyl-D-glucosamine biosynthesis II	0.134326	0.0137602	0.00235707
PWY-5081: L-tryptophan degradation VIII (to tryptophol)	0.41297	0.0371408	0.00210616
PWY-5754: 4-hydroxybenzoate biosynthesis I (eukaryotes)	0.187178	0.0182825	0.00202367
PWY3O-1109: superpathway of 4-hydroxybenzoate biosynthesis (yeast)	0.187178	0.0182825	0.0020127
PWY-6396: superpathway of 2,3-butanediol biosynthesis	0.414342	0.0371845	0.00200874
LYSINE-DEG1-PWY: L-lysine degradation XI (mammalian)	0.187178	0.0182825	0.00199432
PWY-1622: formaldehyde assimilation I (serine pathway)	0.187178	0.0182825	0.00197218
P261-PWY: coenzyme M biosynthesis I	0.412916	0.0371408	0.00195847
PWY-181: photorespiration	0.187178	0.0182825	0.00194559
PROTOCATECHUATE-ORTHO-CLEAVAGE-PWY: protocatechuate degradation II (ortho-cleavage pathway)	0.0108548	0.00125939	0.00189363
PWY-7288: fatty acid &beta;-oxidation (peroxisome, yeast)	0.566582	0.0498759	0.0018874
PWY-6433: hydroxylated fatty acid biosynthesis (plants)	0.41297	0.0371408	0.00186954
PWY66-391: fatty acid &beta;-oxidation VI (peroxisome)	0.566582	0.0498759	0.00185939
P122-PWY: heterolactic fermentation	0.331183	0.0303043	0.00181985
PWY-5415: catechol degradation I (meta-cleavage pathway)	0.00514499	0.000615639	0.00174085
PWY-7036: very long chain fatty acid biosynthesis II	0.41297	0.0371408	0.00173218
PWY-7592: arachidonate biosynthesis III (metazoa)	0.41297	0.0371408	0.00169314
PWY-7053: docosahexaenoate biosynthesis I (lower eukaryotes)	0.41297	0.0371408	0.00167709
PWY-6467: Kdo transfer to lipid IVA III (Chlamydia)	0.540684	0.0479087	0.00133921
PWY-7270: L-methionine salvage cycle II (plants)	0.279919	0.025782	0.00132114
PWY-7199: pyrimidine deoxyribonucleosides salvage	0.241864	0.0226766	0.00112721
PWY-5675: nitrate reduction V (assimilatory)	0.564419	0.0498759	0.00109119
PWY-7013: L-1,2-propanediol degradation	4.28e-08	9.52e-09	0.00108352
PWY66-388: fatty acid &alpha;-oxidation III	0.486956	0.0432392	0.00107383
PWY-5265: peptidoglycan biosynthesis II (staphylococci)	0.567635	0.0498759	0.00103619
URSIN-PWY: ureide biosynthesis	0.383568	0.0349455	0.00102937
PWY66-367: ketogenesis	0.141615	0.0144364	0.00102761
LPSSYN-PWY: superpathway of lipopolysaccharide biosynthesis	0.00188456	0.000236274	0.00101454
PWY-7316: dTDP-N-acetylviosamine biosynthesis	0.154862	0.0157106	0.000892742
PWY-6749: CMP-legionaminate biosynthesis I	0.372215	0.0339849	0.000857359
PWY-6435: 4-hydroxybenzoate biosynthesis V	0.183713	0.018198	0.000696726
PWY-5079: L-phenylalanine degradation III	0.293458	0.026911	0.00067045
PWY-4321: L-glutamate degradation IV	0.0704252	0.00739986	0.000370765
POLYAMINSYN3-PWY: superpathway of polyamine biosynthesis II	0.00229448	0.000283436	1.69e-05
